# Supplementary material for: High Prevalence of Methanobrevibacter smithii and Methanosphaera stadtmanae Detected in the Human Gut Using an Improved DNA Detection Protocol
Source: PLoS One. 2009 Sep 17;4(9):e7063. doi: 10.1371/journal.pone.0007063 (PMC2738942; doi:10.1371/journal.pone.0007063)
Supplement: Table S1 — The Ct values for the real-time PCR detection of M. smithii and M.stadtmanae in human stools. (0.10 MB XLS) [file pone.0007063.s001.xls]

## Sheet: Feuil1
				M. smithii /gram of stool		M. stadtmanae / gram of stool
Specimen Number	Sex	Age [year/month (M) or day (D)]	Pathogens	16S rRNA gene copy number	rpoB gene copy number	16S rRNA gene copy number	rpoB gene copy number
1	F	11 M	-	0	0	0	0
2	H	67	-	2085300	303856	7005	0
3	F	67	-	2.66294e+06	938934	69	0
4	H	82	-	14824321500	3561839400	12225000	9084879
5	F	11	-	42454.8	36.9	0	0
6	H	2	-	0	0	0	0
7	H	10	-	139835	7779.6	14670	885
8	F	11	-	650.7	0	0	0
9	H	5	-	107.1	0	0	0
10	H	8	-	0	0	0	0
11	F	76	-	0	0	0	0
12	F	22	-	2823	0	0	0
13	F	22	-	2388	0	0	0
14	F	73	-	42705	10099.5	891	0
15	F	65	-	132000000000	288900000	443869860	141539355
16	H	55	-	5856000	1712610	0	0
17	H	48	-	813	309	0	0
18	H	9 M	-	600	0	0	0
19	F	94	-	3359683500	670672470	4875	0
20	H	11	-	720	85.5	16530	14934
21	F	42	-	390	0	0	0
22	F	65	-	36000000000	23400000	28331088	9.37533e+06
23	H	95	-	97050	0	0	0
24	H	2 M	-	384	0	0	0
25	F	27	-	450	0	0	0
26	H	48	-	40620	8347.15	0	0
27	H	76	-	36900000000	22650000000	19965	17691.6
28	F	38	-	4703590500	1322172660	176972319	54444660
29	F	9	-	3600	93	0	0
30	H	10	-	751.2	84.9	0	0
31	H	50	-	2139	0	0	0
32	H	11 M	-	556.2	0	0	0
33	H	9 M	-	594	0	0	0
34	F	88	-	1755450	506850	0	0
35	H	49	-	6.44147e+09	1621318200	584956590	2.05187e+08
36	F	62	-	2778	0	0	0
37	H	14	-	0	0	0	0
38	F	48	-	1569	0	0	0
39	F	78	-	8386.8	0	0	0
40	H	85	-	456	107.4	0	0
41	H	56	-	351	80.7	0	0
42	F	22 M	-	0	0	0	0
43	F	11	-	333690	120767	0	0
44	F	27	-	2899.59	255	0	0
45	F	24	-	60776.7	5569.2	0	0
46	H	75	-	2931	126	0	0
47	H	16	-	2577	226.8	12225	9064.2
48	F	24	Shigella sonnei	504	0	0	0
49	F	8 M	-	684	0	0	0
50	F	40	-	393	0	0	0
51	F	9	-	5250	1836.9	0	0
52	F	81	-	42000	16835.7	0	0
53	H	15 M	-	5198.4	1580.7	0	0
54	H	56	-	5511	1905	0	0
55	H	5	-	0	0	0	0
56	F	24	-	1023	0	0	0
57	H	64	-	38700	1005	0	0
58	H	75	-	566808	246150	0	0
59	H	62	-	5955	2691	0	0
60	F	75	-	558	0	0	0
61	F	23	-	0	0	0	0
62	H	22	-	2472714600	761163930	7573.2	0
63	H	85	-	1.73967e+09	18694440	9102.9	6630
64	H	86	-	3144478200	105765630	1833.6	0
65	F	87	-	5160	195.9	0	0
66	F	78	-	1290	0	0	0
67	H	75	-	2448	234	0	0
68	F	43	-	306930	10650	2424	83.4
69	H	95	-	28680	7067.4	0	0
70	H	57	-	223.2	0	0	0
71	F	53	-	14346	3090	0	0
72	F	24	-	3105	2952	0	0
73	F	59	-	3604500	90711	0	0
74	F	37	-	969	0	0	0
75	F	68	-	6612	0	0	0
76	H	67	-	185912685	81998052	1858.34	0
77	F	70	-	3150	0	0	0
78	H	9	-	5070	359.94	0	0
79	H	2 M	Staphylococcus aureus	1290	232.11	0	0
80	H	69	-	3157.8	633.649	0	0
81	H	45	-	1131	318	0	0
82	H	85	-	710524680	2.68328e+07	2407.89	0
83	H	66	-	885.6	477	0	0
84	F	15 M	-	2295	150	0	0
85	H	64	-	358323720	5.83932e+07	2525673	777961
86	F	2	-	1497	0	0	0
87	H	9	-	1857	1035	0	0
88	F	88	-	662286930	437574840	444	0
89	F	2	-	5112	2340	467.1	0
90	F	1 M	-	5277	3657	0	0
91	H	20	-	233790	77370	16485	2325.3
92	F	63	-	136527840	43160091	4.67009e+06	1.80317e+06
93	F	64	-	305.1	0	0	0
94	F	85	-	70623.6	5990.1	0	0
95	H	72	-	9499836000	6.5035e+09	9497.37	7763.7
96	H	37	-	302736	56070	0	0
97	H	56	-	2328	837	0	0
98	F	65	-	498	105	0	0
99	H	10	-	49398	6471	0	0
100	H	62	-	1981320	642270	0	0
101	H	56	-	151920	7170	0	0
102	F	18 M	-	18900	1230	0	0
103	F	94	-	20460	3177	0	0
104	H	56	-	388350	35664	0	0
105	F	58	-	1902	0	0	0
106	F	63	-	59700	237	0	0
107	H	41	-	2697000	370680	96360	85709.1
108	H	57	-	189749	86224.2	0	0
109	H	82	-	375	0	0	0
110	H	79	-	594	0	0	0
111	H	9	-	256.2	0	0	0
112	F	85	-	861	0	0	0
113	F	26	-	54720	7709.4	0	0
114	F	36	-	45300000000	10061748000	24159.9	9979.2
115	H	58	-	1704	0	0	0
116	F	11	-	648	0	0	0
117	H	22	-	606	0	0	0
118	H	72	-	454530	73068	0	0
119	H	45	-	444	0	112.8	0
120	F	4	-	2289	0	0	0
121	H	60	-	5448	976.269	0	0
122	H	11 M	-	436.8	0	0	0
123	H	62	-	0	0	0	0
124	F	14	-	528	0	0	0
125	F	31	-	414	0	0	0
126	F	72	-	15274470	2.21841e+06	141	0
127	H	59	-	0	0	0	0
128	H	10	-	426	0	0	0
129	H	15 M	-	5568.9	109.5	0	0
130	F	21	-	48650.1	693.9	0	0
131	H	62	-	58999.2	16915.5	0	0
132	H	84	-	882	0	0	0
133	H	84	-	564	0	0	0
134	H	90	Salmonella enterica	0	0	0	0
135	H	4 M	-	573	0	0	0
136	H	56	-	31101	495	0	0
137	F	50	-	8637	168.6	0	0
138	F	16 M	-	0	0	0	0
139	F	5	-	0	0	0	0
140	H	10	-	4656.3	0	0	0
141	F	78	-	420	0	0	0
142	F	26	-	423	0	0	0
143	H	47	-	678570	248084	0	0
144	H	72	-	1690705200	607027590	981.9	0
145	F	58	-	43636.2	27869.4	0	0
146	H	14	-	0	0	0	0
147	H	39	-	2268	0	0	0
148	F	11	-	494400	121088	0	0
149	F	41	-	2469	0	0	0
150	H	45	-	3358.8	79.8	0	0
151	F	58	-	2088	84.3	0	0
152	F	96	-	40170	1110	0	0
153	H	73	-	2334	675	0	0
154	H	21	-	693	0	0	0
155	F	83	-	1346850	502530	85668	33776.7
156	F	63	-	54900	673.2	0	0
157	F	11	-	2433	0	0	0
158	F	21 M	-	576.9	0	0	0
159	H	65	-	59067	22884	0	0
160	H	49	-	1605	185.1	0	0
161	H	54	-	564	73.5	0	0
162	H	22	-	432	0	0	0
163	H	5	-	4092	105	0	0
164	F	55	-	84859.8	2969.4	0	0
165	F	30	-	30738	17079.6	0	0
166	H	69	-	1509	0	0	0
167	H	66	-	306	237	0	0
168	F	69	-	5490	79.062	0	0
169	H	45	-	1680	582	0	0
170	F	73	-	92700000000	15990000000	29400	22093.6
171	F	24	-	864	0	0	0
172	F	98	-	297.6	0	0	0
173	H	1 M	-	327	150.6	0	0
174	F	76	-	498	197.4	0	0
175	H	10	-	342	175.5	0	0
176	H	64	-	48000000000	6600000000	0	0
177	H	23	-	5340	60	0	0
178	F	70	-	8.83902e+08	660266340	342	0
179	H	22	-	8635692600	4666159200	12942	9669
180	F	79	-	99815	2769	56370	47637
181	H	22	-	26706	2716.8	151263	83550
182	H	91	-	16591101	5773230	38760	28314.6
183	H	83	-	362373	63222	0	0
184	F	70	-	717923340	372385920	1533	0
185	F	64	-	297980	71961	0	0
186	H	60	-	1591080	280007	0	0
187	H	14	-	21683.1	2519.07	0	0
188	H	63	-	294966	16260	18060	59160
189	F	82	-	286500	57600	0	0
190	F	71	-	1.72069e+09	701229360	2526	0
191	H	80	-	1112864100	713482140	5130	0
192	H	62	-	0	0	0	0
193	H	86	-	75831	3690	0	0
194	H	65	-	9640169400	15350914500	19701	0
195	F	79	-	303.9	0	0	0
196	H	46	-	36300000000	20789005500	9133323600	2540784300
197	F	53	-	101995	15658.8	0	0
198	F	73	-	3618130500	1787874300	14259	1769.1
199	F	59	-	6.45087e+09	5272450500	230991	132169
200	H	33	-	1907702700	32931840	455503980	182033625
201	H	69	-	370.2	0	0	0
202	F	80	-	719886	129704	0	0
203	H	41	-	127680	5220	0	0
204	H	18 D	-	71790	4596	0	0
205	F	57	-	1350300	1117962	0	0
206	H	83	-	267570	15633	0	0
207	F	18 M	-	267	4875	0	0
208	H	22	-	516	5169	22533	38880
209	H	10	-	0	0	0	0
210	H	45	-	270690	22499.7	0	0
211	F	11	-	106800	2958	0	0
212	H	66	-	42639	21639.9	0	0
213	H	62	-	8.03735e+06	1.00376e+06	6543	0
214	H	52	-	2778402750	937527000	12120	106.8
215	H	60	-	59700	12690	0	0
216	H	82	-	3858432600	2033762700	491809140	164008710
217	H	60	-	3.15389e+09	1268691750	626047590	171716430
218	H	65	-	150414	8499	0	0
219	H	60	-	351	0	0	0
220	F	37	-	48990	7686	0	0
221	F	30	-	468	0	0	0
222	H	11	-	0	0	0	0
223	F	75	-	273390	8895	21776.7	10761
224	F	42	-	13758	0	0	0
225	F	68	-	38953.5	7329	0	0
226	F	78	-	38400	17250	0	0
227	H	79	-	9742746	3.00569e+06	0	0
228	F	89	-	69600	5966.7	4827	0
229	H	5 M	-	40350	2900.7	0	0
230	H	66	-	105368	7671	97794	46551
231	H	10	-	35490	2329.8	0	0
232	H	80	-	17880	1326	0	0
233	H	21 M	-	9570	0	61767	8179.2
234	H	22	-	6534	0	0	0
235	H	47	-	123398	10770	0	0
236	H	79	-	5501130000	2496461250	14376	9792
237	H	32	-	58995	10290	0	0
238	H	79	-	520050000	155891130	3294	0
239	F	25	-	49380	8460	0	0
240	H	63	-	72210	15699	0	0
241	H	9	-	159	0	4401	2998.5
242	F	92	-	154081698	50423670	0	0
243	H	7 M	-	0	0	0	0
244	H	1 M	-	42600	2988	0	0
245	F	28 M	-	7027.5	0	0	0
246	F	41	-	9639	73.8	0	0
247	F	11	-	24600	7947	0	0
248	F	56	-	237675	44619	469.8	0
249	F	78	-	19552.3	9630	0	0
250	H	49	-	200397	60306.6	0	0
251	H	0 D	-	130698	24891	0	0
252	F	8 6	-	38880	168.9	0	0
253	H	44	-	32667	3706.2	0	0
254	F	11	-	0	0	0	0
255	F	78	-	1174110	84240	0	0
256	F	46	-	128340	11164.7	0	0
257	F	85	-	19002	2039.4	0	0
258	H	28	-	17692.2	3666.9	0	0
259	H	22	-	1320	0	0	0
260	F	52	-	133975500	60075492	4299	4269
261	F	76	-	276327	8823	0	0
262	H	44	-	4798206000	2000170440	26526	21639.3
263	F	63	-	127500	22770	0	0
264	H	21M	-	9732	0	0	0
265	H	4	-	76050	18699	0	0
266	H	68	-	44355	6675	0	0
267	F	69	-	46945818000	120681891	2156.4	0
268	F	87	-	9927951000	9869820000	13851	1576.5
269	F	79	-	8664417600	9983797500	18684.9	2692.8
270	F	65	-	269970	38508	0	0
271	F	22	-	29190	2292	0	0
272	H	13	-	43106.1	2655.6	0	0
273	H	9	-	15540	0	0	0
274	F	56	-	60570	2852.1	0	0
275	F	11	-	3645	0	0	0
276	F	16	-	9378	386.1	971.7	0
277	F	31	-	851605860	249843480	0	0
278	H	77	-	99706.8	2895.9	0	0
279	H	36	-	22988.1	98.67	0	0
280	H	90	-	143990	15888	0	0
281	H	50	-	994225	489460	0	0
282	H	10	-	445.5	0	0	0
283	F	65	-	16140	0	0	0
284	H	86	-	1446068100	587804640	4758	3998.7
285	F	40	-	3427947600	2819159700	20814	2964
286	H	22	-	567	0	0	0
287	H	9	-	7680	1729.8	0	0
288	F	7	-	59760	676.5	432930	106287
289	H	61	-	25494840000	16175139000	1365856320	369638070
290	H	78	-	190440	13654.2	0	0
291	H	48	-	29130	1662.3	0	0
292	F	7	-	9694.5	0	0	0
293	F	65	-	456	0	46359	33640.8
294	H	26	-	1015691400	595116750	41481	30395.1
295	H	9	-	285840	97983	0	0
296	H	10 M	-	34890	97.47	711681	121110
297	F	79	-	258	0	0	0
298	H	88	-	1048800750	295862160	699945840	114868746
299	H	29 M	-	57360	19580.7	0	0
300	F	80	-	56400	4182	0	0
301	H	36	-	498	0	303.3	0
302	F	69	-	952569	126507	0	0
303	H	9	-	93600	26361	3111	0
304	H	87	-	2394	96	27150	12650.7
305	H	9	-	20518.5	36.9	0	0
306	H	78	-	344286000	190967835	888	0
307	H	24 M	-	4896	89.4	0	0
308	H	9	-	609	0	0	0
309	H	77	-	252780	51464.2	0	0
310	H	77	-	79599	966	0	0
311	F	80	-	5613000	370634	0	0
312	H	60	-	595.8	0	0	0
313	H	77	-	7.2548e+09	3.71702e+09	24634.3	189.6
314	F	11	-	1480200	231240	0	0
315	F	37	-	30804	1575	0	0
316	F	59	-	646269840	207592992	3.67344e+06	783768
317	F	16 M	-	0	0	0	0
318	F	51	-	34650	1436.7	0	0
319	H	86	-	937761	210342	0	0
320	F	75	-	102450	8623.8	0	0
321	F	56	-	0	0	0	0
322	H	8	-	0	0	0	0
323	F	87	-	17214720000	10224474000	118740	6888.9
324	H	67	-	139073814	42465177	1740	0
325	H	81	-	619734	115967	0	0
326	F	4	Salmonella enterica	8070	0	0	0
327	F	63	-	70950	199.23	0	0
328	H	3	-	735	0	0	0
329	H	80	-	643830	76923.2	0	0
330	F	68	-	165644	21342.9	0	0
331	F	19	-	30690	9684.3	0	0
332	H	68	-	119925	11380.2	0	0
333	H	9	-	270	0	0	0
334	H	46	-	116823	45966.3	0	0
335	F	79	-	147041370	2.00472e+08	594000	429660
336	F	85	-	861433680	2.88931e+08	2.5349e+06	1997007
337	H	69	-	229759	47629.2	0	0
338	H	9	-	29989.2	1896.33	0	0
339	H	57	-	66640.2	28953	0	0
340	F	76	-	324356	109230	0	0
341	F	52	-	65256	2892	0	0
342	H	59	-	26640	13563.3	0	0
343	H	68	-	51330	22158	0	0
344	H	9	-	360399	85590	0	0
345	H	3	-	2895	386.1	0	0
346	F	57	-	234.9	0	0	0
347	F	51	-	7638.9	473.4	0	0
348	H	65	-	100350	388.2	0	0
349	H	8	-	225.96	0	0	0
350	H	67	-	137010	22173	0	0
351	H	67	-	787474	267577	6495	1673.1
352	H	41	-	27127131	7025814	1.95729e+06	708701
353	H	63	-	21900	11929.7	0	0
354	F	11	-	15644.1	209.4	0	0
355	F	67	-	690	0	0	0
356	H	77	-	55500	25689.6	0	0
357	H	4	-	21654367500	3.72722e+09	42	0
358	H	41	-	262410	61434	49740	7440
359	H	81	-	62129298	17881530	31945026	6624060
360	F	63	-	3510	0	0	0
361	F	60	-	70692	2764.8	0	0
362	H	77	-	285780	132462	1344.6	0
363	H	41	-	22375629	6.82394e+06	105967	14460
364	F	11	-	132693	3718.8	0	0
365	H	73	-	1.16178e+07	1.79818e+06	0	0
366	H	87	-	6630	963	0	0
367	F	53	-	960830	229047	0	0
368	H	62	-	121503705	3.66716e+07	0	0
369	F	12	-	2940	0	0	0
370	H	5	-	8220	1062	0	0
371	H	77	-	5895	2040	0	0
372	F	64	-	1214965500	596181930	0	0
373	H	82	-	145200000000	23989200000	14462806500	2743705500
374	H	67	-	1015350	132666	3642	1487.7
375	H	77	-	12090	21570	0	0
376	H	9	-	21390	663	0	0
377	H	38	-	4467993000	2718098820	12	0
378	F	51	-	16669.2	66	0	0
379	F	59	-	1.98445e+07	1.51974e+07	91800	8061
380	F	64	-	588	0	0	0
381	F	87	-	67107	38612.3	1338	0
382	F	25 M	-	3690	0	0	0
383	F	5	-	1120950	261480	3288	2566.8
384	H	88	-	15552792000	4130751600	1847310300	306041550
385	H	85	-	200118000	74064690	70456.8	3610.8
386	H	21	-	4481400000	1490755980	398.4	0
387	H	55	-	4884903000	1.699e+09	30	0
388	H	60	-	7115.7	5210.1	0	0
389	H	55	-	12483	3660	3360	438
390	F	74	-	10608	1962	666	474
391	H	53	-	5295	0	0	0
392	F	83	-	5505	1092	3867	564
393	H	79	-	1880700	266220	1923	0
394	F	68	-	81770685	99552630	0	0
395	F	53	-	139085	9474	0	0
396	F	23	-	749776	488160	0	0
397	H	77	-	51660	9900	0	0
398	H	89	-	12375123000	2724385800	1649525250	238456890
399	H	78	-	6.02821e+06	4.35379e+06	1221	0
400	H	56	-	2.35934e+06	670259	1596531	302484
401	H	47	-	7.46361e+06	3.91478e+06	2115	612
402	H	1 M	-	0	0	0	0
403	H	18 M	-	477	0	0	0
404	H	20	-	441	0	0	0
405	H	77	-	333	0	0	0
406	H	15 M	-	0	0	0	0
407	H	41	-	235800	59970	25500	2367.91
408	F	75	-	9705	0	0	0
409	H	86	-	34620	15790.2	1230	0
410	H	9	-	75600	30806.1	0	0
411	H	85	-	18690	2659.5	0	0
412	H	9	-	369	0	0	0
413	F	91	-	67884000	31719720	0	0
414	F	81	-	456.9	0	0	0
415	F	93	-	660	0	0	0
416	H	9	-	285	0	3690	1098
417	H	6	-	375.9	0	0	0
418	F	75	-	99706.8	67646.1	0	0
419	H	49	-	386.7	0	0	0
420	H	77	-	1767	0	0	0
421	H	4	-	4830	0	0	0
422	H	38	-	77340	39706.8	6360	936.6
423	F	78	-	840210	565740	0	0
424	F	18	-	1051470	412257	0	0
425	H	63	-	1370865840	658392360	765000	9770.7
426	H	12	-	14115546000	3422842500	7740000	2.13132e+06
427	F	31	-	127161	78936	0	0
428	H	55	-	4569	0	723	0
429	H	4	-	6867	3371.4	0	0
430	H	57	-	5992.5	0	0	0
431	F	18 M	-	5550	0	0	0
432	F	73	-	58800	0	0	0
433	H	34	-	16158	8333.7	0	0
434	H	37	-	3756	0	0	0
435	H	55	-	2100	0	0	0
436	F	13	-	1650	0	0	0
437	H	58	-	144717	29622.3	0	0
438	H	9	-	10500	6780	0	0
439	H	7	-	6420	0	0	0
440	H	54	-	1039.5	0	0	0
441	H	26	-	4596.3	2896.2	0	0
442	F	51	-	70560	3869.1	0	0
443	F	63	-	446610	64109.7	0	0
444	H	63	-	266335758	90751920	138202149	2.40112e+07
445	H	56	-	45699	3057.9	0	0
446	H	64	-	120840	9630.3	0	0
447	F	48	-	4107	0	0	0
448	H	52	-	45743.7	238.8	593.1	0
449	F	71	-	53698.5	7320	0	0
450	F	72	-	59889.6	37.2	0	0
451	H	9	-	2985	0	0	0
452	H	9	-	0	0	0	0
453	H	52	-	1.69935e+07	9.94271e+06	812333	110263
454	F	47	-	0	0	0	0
455	F	80	-	245819520	100317774	4.28718e+06	637549
456	F	1 M	-	211332	61096.2	0	0
457	H	44	-	1266.6	0	0	0
458	F	60	-	132369	17933.4	0	0
459	F	54	-	208584	54663.3	840	555
460	F	64	-	3534	0	0	0
461	H	4	-	370.5	0	0	0
462	H	77	-	0	0	0	0
463	F	44	-	1706218200	764134020	1020660	688977
464	H	76	-	429663	145695	0	0
465	F	30 M	-	1188	0	0	0
466	F	1 M	-	4054.5	0	0	0
467	F	72	-	4842	0	0	0
468	H	80	-	7941	6402	0	0
469	H	32	-	0	0	0	0
470	H	47	-	840	0	0	0
471	F	81	-	2758935	86388	88583.1	6716.4
472	H	77	-	13650	12669	0	0
473	H	15	-	3209.1	0	0	0
474	H	47	-	0	0	0	0
475	F	44	-	28126728000	4377924000	55.2	0
476	H	57	-	13698669000	6283842300	132807300	580044900
477	F	47	-	720337590	398319090	2.64363e+08	37467000
478	H	71	-	30930	9676.2	0	0
479	F	5	-	117600000000	6900000000	36000000	24600000
480	H	75	-	112200000000	8550000000	168	0
481	F	46	-	9997.8	306	0	0
482	H	81	-	22645588500	2831379000	42	0
483	H	76	-	2751189	337987	0	0
484	F	48	-	60693	13996.8	0	0
485	F	22	-	8.51034e+06	4.11899e+06	1191.9	0
486	H	64	-	240693	29637	0	0
487	F	82	-	1069.8	0	467.7	0
488	F	82	-	1169.4	0	0	0
489	H	41	-	7065	3825.3	0	0
490	F	43	-	7893	2898.9	1149	1040.1
491	F	80	-	6690	0	0	0
492	F	82	-	6406299000	1029067860	182105589	2.42785e+07
493	H	9	-	85962	73070.7	0	0
494	H	77	-	5820	5262.6	0	0
495	H	48	-	9780	8429.4	0	0
496	F	80	-	1593000	1.05788e+06	0	0
497	H	72	-	1007.7	0	2031	0
498	F	43	-	3675	1650	60.33	0
499	H	64	-	182661	120780	5508	1635
500	H	9	-	2151768	76920	33647.6	3904.8
501	H	65	-	647500	248000	983	220
502	F	9	-	471.25	249.75	0	0
503	H	4	-	745	323.75	0	0
504	F	36	-	156.25	45.175	0	0
505	H	91	-	153.475	2.22	0	0
506	F	84	-	83.375	85.5	0	0
507	F	81	-	382.25	226.25	0	0
508	F	2.5	-	262.25	297.75	0	0
509	F	36	-	1212500	650000	3560	2630
510	F	52	-	290.5	197	0	0
511	F	67	-	1050	365	0	0
512	F	67	-	1340	251.5	0	0
513	H	52	-	69750	33375	144	0
514	H	17	-	408.25	100.25	0	0
515	H	35	-	394.5	269.5	0	0
516	F	58	-	396.75	200.25	0	0
517	F	23	-	417000	238250	777	542
518	F	54	-	38975000	10075000	59300	17800
519	H	59	-	16425000	4477500	4430	2560
520	H	15 M	-	1535	400	0	0
521	F	49	-	302	56.85	0	0
522	H	19	-	466.5	296.75	0	0
523	F	81	-	1485	133.3	0	0
524	H	52	-	412.25	29.4	0	0
525	H	3	-	498.75	22.375	0	0
526	H	87	-	26000000	4737500	9650	5180
527	H	42	-	110.457	11.325	0	0
528	H	87	-	9275000	2075000	92.3	37.9
529	F	85	-	90.25	5.4325	0	0
530	H	65	-	154	4.545	0	0
531	H	57	-	10.9075	3.95	0	0
532	F	32	-	620	24.575	0	0
533	H	56	-	4280000	930000	46600	24900
534	H	72	-	21500000	5487500	1920000	713000
535	H	81	-	2.11251e+07	4.62501e+06	62700	46800
536	H	87	-	8.95017e+06	1.95502e+06	599	0
537	H	72	-	8.80002e+06	1.6475e+06	1200000	977000
538	F	87	-	2.75e+07	4.675e+06	2740	695
539	F	45	-	30501075	4.60017e+06	711000	394000
540	H	53	-	7142.5	1532.5	0	0
541	H	77	-	121250000	16725000	35400000	28900000
542	H	66	-	6.20006e+07	8.15013e+06	120000	94600
543	F	76	-	1505	196.25	0	0
544	H	38	-	1132.5	235.5	0	0
545	F	30	-	10975465	5600055	852000	698000
546	H	2	-	9950247	5275053	443000	323000
547	F	62	-	428.25	82.5	0	0
548	H	1	-	100.75	10.575	0	0
549	F	49	-	164.25	11.95	0	0
550	H	66	-	73.175	24.1	0	0
551	H	82	-	4520	305.5	0	0
552	F	36	-	4860	249.5	0	0
553	F	35	-	13200	2307.5	0	0
554	H	4	-	40350	11600	385	0
555	F	60	-	9900	391.75	0	0
556	F	11	-	5597.5	843	0	0
557	F	88	-	24200	7500	0	0
558	F	48	-	52725	19400	185	0
559	F	53	-	2475	575.75	0	0
560	H	87	-	4525000	1675000	2180	564
561	H	64	-	4145	1187.5	0	0
562	H	2	-	6125	3150	0	0
563	F	85	-	70500	1265	0	0
564	H	4	-	68500	26150	0	0
565	H	84	-	166250000	41025000	5360000	916000
566	H	57	-	732.5	376	0	0
567	H	34	-	54750	3697.5	88	0
568	H	43	-	4092.5	856.25	0	0
569	H	67	-	7250	760.75	0	0
570	H	5	-	1515	302.625	0	0
571	H	19 M	-	621.75	42.5	0	0
572	H	74	-	1056.75	137.45	0	0
573	F	85	-	2655	302.75	0	0
574	F	2	-	777.5	0	0	0
575	F	55	-	162	13.825	0	0
576	H	74	-	2125	124	0	0
577	H	39	-	26525	12550	128	99.2
578	F	21	-	17750000	5065000	3550	739
579	F	53	-	4235	2920	0	0
580	F	53	-	1127.5	157.25	0	0
581	H	11 M	-	9075	1882.5	0	0
582	F	4	-	959.75	687.5	0	0
583	F	81	-	6250	1065	0	0
584	H	53	-	3505	259.1	0	0
585	F	23	-	712500	361500	16400	5690
586	F	2	-	4215	787.5	0	0
587	H	10 M	-	3162.5	442.5	0	0
588	H	53	-	4425	1140	0	0
589	H	38	-	3322.5	702.5	0	0
590	F	10	-	780000	215250	325	153
591	F	76	-	2797.5	927.5	0	0
592	H	38	-	3027.5	905	0	0
593	F	81	-	133000	43875	174	0
594	H	94	-	9125	2325	67.8	0
595	F	53	-	2980	337.25	0	0
596	H	68	-	52375	25675	117	88.9
597	F	47	-	63750000	18400000	5660000	4120000
598	H	80	-	23400	6950	220	0
599	F	54	-	456500000	209250000	4,53+E07	9470000
600	F	3	-	2475000	1007500	0	0
601	H	63	-	26900000000	6310000000	629000000	12400000
602	H	14 M	-	315000	75000	0	0
603	F	27	-	209000	45600	0	0
604	F	67	-	35200000	5840000	95.3	0
605	F	81	-	61000000	10900000	0	0
606	H	39	-	97100	14200	290	0
607	F	17 M	-	603000000	143100000	0	0
608	H	36	-	74300000000	14660000000	36900000	9110000
609	F	82	-	62100000000	12600000000	5420	2440
610	H	49	-	1049000	221600	0	0
611	F	10 M	-	92700	393	28.8	0
612	F	57	-	10560	1175	0	0
613	F	6	-	5260	433	0	0
614	H	63	-	22100000	2940000	1980	388
615	F	27	-	4470	0	0	0
616	F	86	-	8270000000	1780000000	7660000	817000
617	H	63	-	332000	164900	0	0
618	F	4	-	460700	159100	0	0
619	F	8 M	-	71100	35600	0	0
620	F	31	-	61000	52000	0	0
621	F	79	-	26600	13330	0	0
622	H	14	-	35800	31590	0	0
623	H	5	-	34970	29300	0	0
624	H	39	-	82900	31100	0	0
625	H	59	-	18390	9960	878	331
626	H	87	-	141900000	47400000	0	0
627	H	74	-	2806000000	93600000	0	0
628	F	3	-	3805	15030	0	0
629	H	15 D	-	39400	26790	0	0
630	F	12	-	8560	11290	0	0
631	H	48	-	1066000000	357000000	28800000	7060000
632	H	64	-	151700000	36400000	115	0
633	F	86	-	298000	156800	0	0
634	F	19	-	157800	88700	0	0
635	F	15 M	-	72900	20130	0	0
636	H	16	-	188500	116100	0	0
637	H	8	-	198300	133800	0	0
638	H	90	-	7390000000	2300000000	8630	1120
639	H	65	-	1657000	701000	0	0
640	H	53	-	902000	386000	0	0
641	H	12	-	416000	160300	0	0
642	F	68	-	3480000	1640000	35.8	0
643	H	43	-	6100000	2540000	0	0
644	H	82	-	45700000000	16470000000	552000	91900
645	H	8 M	-	5350000	2440000	0	0
646	H	68	-	22100000000	7500000000	569000000	98700000
647	F	86	-	17760000	6480000	21.8	0
648	H	75	-	10240000	4310000	0	0
649	H	58	-	3640000000	1194000000	791	0
650	H	16	-	899000000	312000000	13800000	612000
651	H	55	_	73040	62628	0	0
652	H	33	_	17816	5230	0	0
653	H	41	_	3163200	1937600	0	0
654	H	43	_	21964000	9620000	19532000	6020000
655	H	28	_	22460	50.6	0	0
656	H	48	_	19836	888	0	0
657	F	53	_	7.79	0	0	0
658	H	33	_	7854	2548	139.44	0
659	F	51	_	1360.52	109.8	0	0
660	H	36	_	2646800000	412640000	8224	33.3
661	H	47	_	3465.2	42.6	0	0
662	H	46	_	66200000	21300	5620800	9870
663	F	49	_	1610000000	273160000	22616000	87100
664	F	46	_	0	0	0	0
665	F	38	_	1.6648	0	0	0
666	H	53	_	1532	7.67	0	0
667	F	40	_	21968	233	0	0
668	H	27	_	19436	1312	0	0
669	F	11	_	9280	676	0	0
670	H	5	_	27736	387	93.2	0
671	H	49	_	26260	428	0	0
672	H	10	_	16828	864	0	0
673	H	22	_	19988	1360	0	0
674	F	14	_	21304	1700	0	0
675	H	49	_	23200	656	556000000	80280000
676	H	44	_	17768000000	2090800000	102720000	15800000
677	F	45	_	129840000	4970400	0	0
678	H	47	_	3450800	1418800	0	0
679	H	57	_	29632	3296	0	0
680	H	39	_	18572	1800	0	0
681	H	14	_	18840	348.32	0	0
682	H	43	_	3219392	18384	24000	328
683	F	30 M	_	12684	164	0	0
684	F	26 M	_	15192	244	0	0
685	H	32 M	_	16452	292	0	0
686	H	42 M	_	22832	1906800	0	0
687	F	41	_	739200	4800	2692	0
688	H	32	_	1280800000	53092000	876	0
689	F	19	_	3108000000	826360000	0	0
690	F	20	_	118840	27012	0	0
691	F	41	_	1248000000	501560000	4376	11.736
692	H	38	_	5064000	2622800	0	0
693	F	26	_	591760	140532	0	0
694	H	38	_	46088	9980	0	0
695	F	54	_	4268000	1716400	2276	11.9
696	H	58	_	2265200	2140	0	0
697	H	40	_	2037200	115160	0	0
698	F	39	_	175320	2752	23360	112
699	H	54	_	608000000	92044000	1300800	263600
700	H	44	_	202720	182884	0	0
