# Supplementary material for: High Prevalence of Methanobrevibacter smithii and Methanosphaera stadtmanae Detected in the Human Gut Using an Improved DNA Detection Protocol
Source: PLoS One. 2009 Sep 17;4(9):e7063. doi: 10.1371/journal.pone.0007063 (PMC2738942; doi:10.1371/journal.pone.0007063)
Supplement: Table S2 — List of bacteria tested for the specificity of real-time PCR. (0.05 MB XLS) [file pone.0007063.s002.xls]

## Sheet: Feuil1
Species
Bacteroides fragilis
Streptococcus pyogenes
Shigella boydii
Enterococcus faecalis
Pseudomonas aeruginosa
Staphylococcus aureus
Corynebacterium jeikeium
Bacteroides thetaiotaomicron
Enterococcus faecium
Acinetobater haemolyticus
Klebsiella pneumoniae
Enterobacter cancerogenus
Enterobacter cloacae
Providencia stuartii
Proteus mirabilis
Propionibacterium acnes
Bifidobacterium
Escherichia hermanii
Citrobacter freundii
Citrobacter koseri
Escherichia coli
Campilobacter jejuni
Salmonella enterica enterica
Salmonella enterica arizonae
Lactococcus plantarum
Streptococcus gallolyticus
Klebsiella oxytoca
Streptococcus entericus
Gemella morbillorum
Enterococcus gallinarum
Streptococcus oralis
Streptococcus agalactiae
Kluyvera ascorbata
Mycobacterium avium
Yersinia enterolitica
Mycobacterium tuberculosis
Halobacterium sp
Methanosarcina acetivorans
Sulfolobus solfataricus
Aeropyrum pernix
Methanobrevibacter oralis
Methanobrevibater smithii
methanosphaera stadtmanae
